# Supplementary material
Source: PubMed Central journal article supplement (PMC5609116)
Supplement: ja7b06176_si_001.pdf [file ja7b06176_si_001.pdf]

# Supporting Information

## Tryptorubin A, a polycyclic peptide from a fungus-derived Streptomyces

Thomas P. Wyche,<sup>†</sup> Antonio C. Ruzzini,<sup>†</sup> Laura Schwab,<sup>‡</sup> Cameron R. Currie,<sup>‡</sup> and Jon Clardy<sup>†</sup>

<sup>†</sup>*Department of Biological Chemistry and Molecular Pharmacology, Harvard Medical School, 240 Longwood Avenue, Boston, MA, 02115, United States*

<sup>‡</sup>*Department of Bacteriology, University of Wisconsin-Madison, 1550 Linden Drive, Madison, WI, 53706, United States*

### Table of Contents

|                                                                                                |         |
|------------------------------------------------------------------------------------------------|---------|
| General experimental procedures                                                                | S2-S6   |
| Table S1. <sup>1</sup> H and <sup>13</sup> C NMR data for tryptorubin A (DMSO-d <sub>6</sub> ) | S7      |
| Table S2. <sup>1</sup> H and <sup>13</sup> C NMR data for tryptorubin A (CD <sub>3</sub> OD)   | S8      |
| Figure S1. Natural products with similar structural features                                   | S9      |
| Figure S2. Incorporation of <sup>15</sup> N-labeled amino acids in tryptorubin A               | S10     |
| Figure S3. Incorporation of L-tryptophan-(indole-d <sub>5</sub> ) in tryptorubin A             | S11     |
| Figure S4. Incorporation of L-tyrosine-(ring-3,5-d <sub>2</sub> ) in tryptorubin A             | S12     |
| Figure S5. Synthetic modifications of tryptorubin A                                            | S13-S14 |
| Figure S6. Marfey's Method – amino acid analysis                                               | S15     |
| Figure S7. Molecular modeling analysis                                                         | S16     |
| Table S3. Summary of <i>Streptomyces</i> sp. CLI2509 replicons                                 | S17     |
| Table S4. Annotation of genes near NRPSs assigned to the linear hexapeptide                    | S18     |
| Appendix: NMR spectra                                                                          | S18-S24 |
| References                                                                                     | S24-S26 |

## EXPERIMENTAL SECTION

### General Experimental Procedures

Optical rotation was measured with a Jasco P-2000 polarimeter. UV spectra were recorded on an Amersham Biosciences Ultrospec 5300 Pro Spectrophotometer. IR spectrum was measured with a Bruker Alpha-P FTIR spectrometer. NMR spectra were obtained in CD<sub>3</sub>OD and DMSO-d<sub>6</sub> with a Bruker AVANCE II 600 MHz spectrometer equipped with a <sup>1</sup>H{<sup>13</sup>C/<sup>15</sup>N} cryoprobe and a Bruker AVANCE 500 MHz spectrometer equipped with a <sup>13</sup>C/<sup>15</sup>N{<sup>1</sup>H} cryoprobe. HRMS data were acquired with an Agilent 6530B qTOF mass spectrometer. RP HPLC was performed using an Agilent 1100 HPLC system and a Phenomenex Luna C18 column (250 × 10 mm, 5 μm).

**Biological Material.** Fungal specimens were collected and bacteria were isolated in July 2008, in Madison, WI.

**Fermentation, Extraction, and Isolation.** Two 5 mL seed cultures (17 × 100 mm tubes) in medium ISP2 (10 g malt extract, 4 g glucose, 4 g yeast extract per liter of H<sub>2</sub>O) were inoculated with strain CLI2509 and shaken (200 RPM, 30 °C) for seven days. Two hundred fifty mL baffled flasks (2 × 50 mL) containing ISP2 were inoculated with 1 mL seed culture and were incubated (200 RPM, 28 °C) for seven days. Four-liter flasks (8 × 1000 mL) containing medium ISP2 with Diaion HP20 (4% by weight) were inoculated with 10 mL from the 50 mL culture and shaken (200 RPM, 30 °C) for seven days. Filtered HP20 and cells were washed with H<sub>2</sub>O and extracted with acetone. The acetone extract was subjected to RP HPLC (10/90% to 100/0% acetonitrile-H<sub>2</sub>O containing 0.1% acetic acid, 25 min) using a Phenomenex Luna C18 column (250 × 21.2 mm, 5 μm). Fractions containing **1** were subjected to additional RP HPLC (10/90% to 60/40% MeOH-H<sub>2</sub>O containing 0.1% acetic acid, 20 min) using a Phenomenex Luna C18 column (250 × 10 mm, 5 μm). A final step of RP HPLC (10/90% to 35/65% acetonitrile-H<sub>2</sub>O

containing 0.1% acetic acid, 16 min) using a Phenomenex Kinetex biphenyl column (250 × 10, 5 μm) yielded **1** (2.0 mg,  $t_R$  16.0 min). For  $^{13}\text{C}$  incorporation, the same procedure was used (6 × 500 mL) with labeled medium ISP2 (10 g malt extract, 4 g  $\text{U}^{13}\text{C}$ -glucose, 4 g yeast extract per liter of  $\text{H}_2\text{O}$ ). For  $^{15}\text{N}$  incorporation, the same procedure was used with four-liter flasks (2 × 1000 mL) containing labeled medium ISP2 (10 g malt extract, 2 g  $^{15}\text{N}$  ammonium chloride, 2 g yeast extract, 4 g glucose per liter of  $\text{H}_2\text{O}$ ).

**16S Sequencing.** 16S rDNA sequencing was conducted according to standard DNA extraction and PCR protocols procedures.<sup>1</sup> CLI2509 was identified as a *Streptomyces* sp. and demonstrated 99% sequence similarity to *Streptomyces* sp. SPB 171 (accession number EU798708.1). The 16S sequence for CLI2509 was deposited in GenBank (accession number KX839264).

**Molecular Modeling Calculations.** Molecular modeling calculations were performed using Gaussian 09 Revision A.02<sup>2</sup> on the Odyssey cluster maintained by Research Computing at Harvard University and Schrödinger Release 2014-2 MacroModel 9.8. Low energy conformers were obtained using Schrödinger (MMFF, 10000 conformers examined). The low energy conformer for each compound was analyzed using Gaussian 09 for geometry optimization (B3LYP/6-31G(d,p)).<sup>3</sup> Molecules were modeled in the gas phase.

**Determination of Amino Acid Configurations.** L- and DL-FDLA were synthesized as previously reported.<sup>4</sup> Tryptorubin A (**1**) (0.2 mg) was hydrolyzed with 6 N HCl (0.6 mL) for 4 h at 110 °C and dried under vacuum. The acid hydrolysate was dissolved in 100 μL  $\text{H}_2\text{O}$  and split into two equal portions. Each portion was mixed with 1 N  $\text{NaHCO}_3$  (20 μL), acetone (110 μL), and 20 μL of L- or DL-FDLA (10 mg/mL in acetone). Each solution was stirred for 1 h at 40 °C. The reaction was quenched with 1 N HCl (20 μL) and dried under vacuum. A portion of each product was dissolved in MeOH: $\text{H}_2\text{O}$  (1:1) for LCMS analysis.<sup>5</sup> Separation of the derivatives

was achieved with a Phenomenex Kinetex EVO C18 reversed-phase column (2.6  $\mu\text{m}$ , 100 x 2.1 mm) at a flow rate of 0.3 mL/min and with a linear gradient of  $\text{H}_2\text{O}$  (containing 0.1% formic acid) and acetonitrile (90:10 to 100:0 over 11 min). The absolute configuration of the amino acids was determined by comparing the retention times of the L- and DL-FDLA derivatives, which were identified by MS. Retention times of the DL-FDLA amino acid derivatives were 6.8 and 7.2 min (Ala), 7.5 and 8.4 min (Ile), and 5.4 and 5.5 min (Tyr). The retention times of the L-FDLA amino acid derivatives were 6.8 (L-Ala), 7.5 (L-Ile) and 5.4 min (L-Tyr). The absolute configuration of the L-Ile was assigned based on a comparison of retention time of amino acid standards (L-Ile, L-*allo*-Ile) derivatized with L-FDLA.

**Isotopically-labeled amino acid studies.** Small-scale cultures (25 mL) of CLI2509 with HP-20 were grown using the aforementioned fermentation conditions and contained the following labeled amino acids (one labeled amino acid per culture; 15 mg/each):  $^{15}\text{N}$  L-alanine,  $^{15}\text{N}$  L-isoleucine,  $^{15}\text{N}_2$  L-tryptophan, and  $^{15}\text{N}$  L-tyrosine. A control culture with no labeled amino acids was also grown. LCMS analysis of each crude extract showed an increase in  $m/z$  compared to unlabeled tryptorubin A (**1**), making evident the presence of one alanine, one isoleucine, two tryptophans, and two tyrosines in tryptorubin A (**1**) (Figure S2). Fermentation of CLI2509 in ISP2 (500 mL) with 300 mg L-tryptophan-(indole- $\text{d}_5$ ) and containing HP-20 using the aforementioned fermentation conditions and extraction/purification protocol led to the production of tryptorubin A (**1**) with  $m/z$  906.4487. The resulting  $^1\text{H}$  NMR showed that nine hydrogen signals were missing, corresponding to the two tryptophan moieties (See Figure S3). Fermentation of CLI2509 in ISP2 (500 mL) with 300 mg L-tyrosine (ring-3,5- $\text{d}_2$ ) and containing HP-20 using the aforementioned fermentation conditions and extraction/purification protocol led

to the production of tryptorubin A (**1**) with  $m/z$  900.4106. The resulting  $^1\text{H}$  NMR showed that three hydrogen signals were missing, corresponding to the two tyrosine moieties (Figure S4).

**Synthetic modification of tryptorubin A.** For acetylation,<sup>6</sup> 150  $\mu\text{L}$  acetic anhydride was added to tryptorubin A (1.0 mg in 150  $\mu\text{L}$  pyridine), stirred for 24 h at rt, and dried by rotovapor. The product was purified by reversed-phase HPLC (Phenomenex C18 Luna column; 250  $\times$  10 mm, 5  $\mu\text{m}$ ) with MeOH:H<sub>2</sub>O containing 0.1% acetic acid (10:90 to 50:50 in 25 min) and analyzed by NMR and HRMS ( $[\text{M}+\text{H}]^+$   $m/z$  1023.4226). The HRMS data demonstrated that three acetyl groups were added to tryptorubin A (**1**). For methylation,<sup>7</sup> (trimethylsilyl)diazomethane (2 M in hexanes) was added to tryptorubin A (0.5 mg in 400  $\mu\text{L}$  MeOH), stirred at rt for 1 h, and dried by rotovapor. The product was purified by reversed-phase HPLC (Phenomenex C18 Luna column; 250  $\times$  10 mm, 5  $\mu\text{m}$ ) with acetonitrile:H<sub>2</sub>O containing 0.1% acetic acid (60:40 to 100:0 in 25 min) and analyzed by NMR and HRMS. The major product contained one methyl group, for the *O*-methyl at C-1, as evidenced by 1D and 2D NMR (Figure S5).

**DNA isolation, sequencing and analysis.** DNA was isolated from a culture of *Streptomyces* sp. CLI2509 grown in ISP2 for 5 days at 30 °C and shaking at 200 rpm. Briefly, cells were harvested by centrifugation at 4000 rpm, washed once with PBS, and then frozen at -80 °C until the cell pellet was physically disrupted in liquid N<sub>2</sub> using a mortar and pestle. The disrupted cells were then treated with lysozyme (2.5 mg/mL), protease (1 mg/ml), and 1% SDS in a solution of 10 mM Tris:HCl and 1 mM EDTA, adjusted to pH 8.0 (TE buffer), for 30 minutes at 50 °C. The resulting lysate was clarified by centrifugation at 10,000 *g* for 15 minutes before the nucleic acids were precipitated using an equal volume of cold *iso*-propanol. The precipitate was washed twice with a solution of 70% ethanol, resuspended in 10 mM Tris:HCl, pH 8.0 containing 0.1 mg/mL RNase A, and incubated at 37 °C for 1 h. Finally, a solution of

phenol:chloroform:isoamyl alcohol (25:24:1) saturated with TE buffer was used to further purify the DNA, which was then precipitated using *iso*-propanol, dried, and resuspended in water for library preparation and sequencing. Sequencing was performed using PacBio SMRT sequencing technology at the Duke University Center for Genomic and Computational Biology. A 15-20 kb library was prepared and data were collected from 3 SMRT cells using P6-C4 sequencing chemistry. Assembly was performed using the hierarchical genome assembly process (HGAP), and unique contigs were manually curated to remove the low quality positions located at the sequence termini. The final assembly and raw sequence reads are available for download from the NCBI [Genbank accession no. CP021118 and CP021119; SRA accession no. SRP106654]. Putative biosynthetic gene clusters were identified using antiSMASH3.<sup>8</sup> The Genome-to-Genome Distance Calculator 2.1 was used to compare the chromosomes of CLI2509, *Streptomyces* sp. Tü6071, and the *Streptomyces* sp. SPB84 scaffold. The *in silico* DNA-DNA hybridization values are reported for Formula 2; a range is reported for SPB84 due to the incomplete nature of the assembly, which is missing an estimated 0.66 Mb.

**Tryptorubin A (1):** colorless solid;  $[\alpha]_D^{26} +18$  (c 0.1, MeOH); UV (MeOH)  $\lambda_{\max}$  (log  $\epsilon$ ) 214 (4.04), 271 (3.44) nm; IR (ATR)  $\nu_{\max}$  3360, 1651, 1569, 1408, 1247  $\text{cm}^{-1}$ ;  $^1\text{H}$  and  $^{13}\text{C}$  NMR (Table S1); HRMS  $[\text{M}+\text{H}]^+$   $m/z$  897.3928 (calcd for  $\text{C}_{49}\text{H}_{52}\text{N}_8\text{O}_9$ , 897.3930).

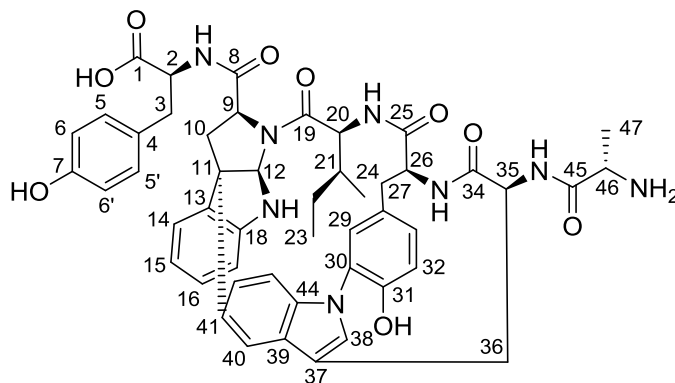

Table S1.  $^1\text{H}$  and  $^{13}\text{C}$  NMR data for **1** (600 MHz for  $^1\text{H}$ , 125 MHz for  $^{13}\text{C}$ , in DMSO- $d_6$ )

| Position | $\delta_{\text{C}}$ , mult. | $\delta_{\text{H}}$ (J in Hz) | COSY       | HMBC              |
|----------|-----------------------------|-------------------------------|------------|-------------------|
| 1        | 174.0, C                    |                               |            |                   |
| 2        | 56.6, CH                    | 3.93, q (6.8)                 | 2-NH, 3    | 1, 3, 4, 8        |
| 2-NH     |                             | 7.27, d (6.8)                 | 2          | 1, 8              |
| 3        | 37.9, CH <sub>2</sub>       | 2.64, m<br>2.84, m            | 2          | 1, 2, 5, 5'       |
| 4        | 129.8, C                    |                               |            |                   |
| 5, 5'    | 130.0, CH                   | 6.88, d (8.3)                 | 6, 6'      | 5, 5', 6, 6', 7   |
| 6, 6'    | 114.9, CH                   | 6.42, d (8.3)                 | 5, 5'      | 5, 5', 6, 6', 7   |
| 7        | 155.8, C                    |                               |            |                   |
| 8        | 170.1, C                    |                               |            |                   |
| 9        | 63.1, CH                    | 4.52, m                       | 10         | 8, 10             |
| 10       | 39.1, CH <sub>2</sub>       | 3.13, m<br>2.10, t (13.2)     | 9          | 8, 9, 11, 12, 13  |
| 11       | 60.9, C                     |                               |            |                   |
| 12       | 92.3, CH                    | 6.78, m                       | 12-NH      | 9, 10, 11, 13, 18 |
| 12-NH    |                             | 6.50, d (3.4)                 | 12         | 11, 13            |
| 13       | 136.3, C                    |                               |            |                   |
| 14       | 123.4, CH                   | 6.77, m                       | 15         | 16, 18            |
| 15       | 118.4, CH                   | 6.64, m                       | 14, 16     | 13, 17            |
| 16       | 128.2, CH                   | 7.09, t (7.8)                 | 15, 17     | 14, 18            |
| 17       | 110.0, CH                   | 6.71, m                       | 16         | 13, 15            |
| 18       | 149.6, C                    |                               |            |                   |
| 19       | 174.8, C                    |                               |            |                   |
| 20       | 58.2, CH                    | 3.67, m                       | 20-NH, 21  |                   |
| 20-NH    |                             | 7.79, m                       | 20         |                   |
| 21       | 36.5, CH                    | 1.59, m                       | 20, 22, 24 | 23, 24            |
| 22       | 25.3, CH <sub>2</sub>       | 1.22, m                       | 21, 23     |                   |
| 23       | 11.5, CH <sub>3</sub>       | 0.86, t (6.8)                 | 22         | 21, 22            |
| 24       | 15.6, CH <sub>3</sub>       | 0.95, d (6.4)                 | 21         | 20, 21, 22        |
| 25       | 170.2, C                    |                               |            |                   |
| 26       | 52.0 CH                     | 4.07, m                       | 26-NH, 27  | 28                |
| 26-NH    |                             | 6.14, d (3.4)                 | 26         |                   |
| 27       | 32.4, CH <sub>2</sub>       | 2.71, m<br>2.66, m            | 26         | 26, 28            |
| 28       | 125.9, C                    |                               |            |                   |
| 29       | 131.8, CH                   | 5.76, s                       |            | 30, 31, 33        |
| 30       | 132.5, C                    |                               |            |                   |
| 31       | 149.6, C                    |                               |            |                   |
| 31-OH    |                             | 7.28, s                       |            |                   |
| 32       | 117.5, CH                   | 6.75, m                       | 33         | 28, 30            |
| 33       | 128.3, CH                   | 6.66, m                       | 32         | 30, 31            |
| 34       | 169.0, C                    |                               |            |                   |
| 35       | 54.0, CH                    | 4.52, m                       | 35-NH, 36  |                   |
| 35-NH    |                             | 7.97, d (8.3)                 | 35         | 45                |
| 36       | 27.5, CH <sub>2</sub>       | 2.67, m                       | 35         | 37                |
| 37       | 120.9, C                    |                               |            |                   |
| 38       | 146.4, CH                   | 6.89, s                       |            | 37, 39, 44        |
| 39       | 139.1, C                    |                               |            |                   |
| 40       | 123.6, CH                   | 7.17, s                       |            | 11, 37, 42, 44    |
| 41       | 136.1, C                    |                               |            |                   |
| 42       | 123.3, CH                   | 7.44, d (8.3)                 | 43         | 11, 40, 44        |
| 43       | 115.7, CH                   | 7.06, d (8.3)                 | 42         | 39, 41            |
| 44       | 153.1, C                    |                               |            |                   |
| 45       | 175.2, C                    |                               |            |                   |
| 46       | 50.7, CH                    | 3.18, m                       | 47         |                   |
| 47       | 22.0, CH <sub>3</sub>       | 1.07, d (6.8)                 | 46         | 45, 46            |

Table S2.  $^1\text{H}$  and  $^{13}\text{C}$  NMR data for **1** (600 MHz for  $^1\text{H}$ , 125 MHz for  $^{13}\text{C}$ , in  $\text{CD}_3\text{OD}$ )

| Position | $\delta_{\text{C}}$ , mult. | $\delta_{\text{H}}$ (J in Hz) |
|----------|-----------------------------|-------------------------------|
| 1        | 173.9, C                    |                               |
| 2        | 57.3, CH                    | 4.39, m                       |
| 3        | 38.1, $\text{CH}_2$         | 3.05, m<br>2.86, m            |
| 4        | 129.8, C                    |                               |
| 5, 5'    | 130.0, CH                   | 6.92, d (7.8)                 |
| 6, 6'    | 115.9, CH                   | 6.40, d (7.8)                 |
| 7        | 155.8, C                    |                               |
| 8        | 170.6, C                    |                               |
| 9        | 63.1, CH                    | 4.70, m                       |
| 10       | 38.9, $\text{CH}_2$         | 3.20, m<br>2.16, t (12.7)     |
| 11       | 59.9, C                     |                               |
| 12       | 94.1, CH                    | 6.97, m                       |
| 13       | 137.0, C                    |                               |
| 14       | 123.4, CH                   | 6.86, m                       |
| 15       | 118.5, CH                   | 6.77, m                       |
| 16       | 128.2, CH                   | 7.18, m                       |
| 17       | 112.0, CH                   | 6.89, m                       |
| 18       | 150.3, C                    |                               |
| 19       | 173.9, C                    |                               |
| 20       | 57.7, CH                    | 3.87, m                       |
| 21       | 36.5, CH                    | 1.71, m                       |
| 22       | 24.3, $\text{CH}_2$         | 1.30, m                       |
| 23       | 11.5, $\text{CH}_3$         | 0.95, t (7.6)                 |
| 24       | 16.3, $\text{CH}_3$         | 1.00, d (6.4)                 |
| 25       | 170.2, C                    |                               |
| 26       | 51.6, CH                    | 4.13, m                       |
| 27       | 33.4, $\text{CH}_2$         | 3.00, m<br>2.77, m            |
| 28       | 125.9, C                    |                               |
| 29       | 131.8, CH                   | 5.94, s                       |
| 30       | 132.6, C                    |                               |
| 31       | 150.2, C                    |                               |
| 32       | 117.2, CH                   | 6.76, m                       |
| 33       | 128.3, CH                   | 6.74, m                       |
| 34       | 169.0, C                    |                               |
| 35       | 53.7, CH                    | 4.38, m                       |
| 36       | 27.5, $\text{CH}_2$         | 2.97, m<br>2.85, m            |
| 37       | 120.8, C                    |                               |
| 38       | 147.7, CH                   | 6.83, s                       |
| 39       | 139.1, C                    |                               |
| 40       | 123.6, CH                   | 7.44, s                       |
| 41       | 136.1, C                    |                               |
| 42       | 123.3, CH                   | 7.44, m                       |
| 43       | 116.0, CH                   | 7.17, m                       |
| 44       | 154.7, C                    |                               |
| 45       | 176.4, C                    |                               |
| 46       | 51.0, CH                    | 3.49, m                       |
| 47       | 20.6, $\text{CH}_3$         | 1.35, d (6.5)                 |



**Figure S1.** Natural products with similar structural features<sup>9-16</sup>

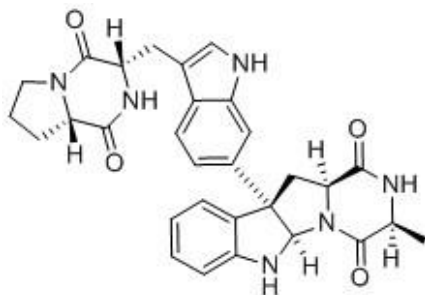

Nasesezine A

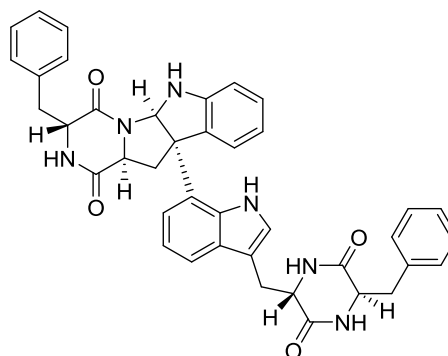

Asperazine

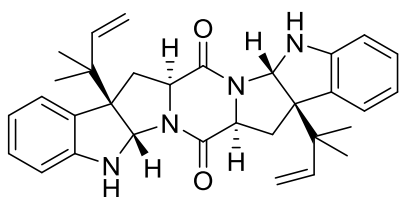

Amauromine

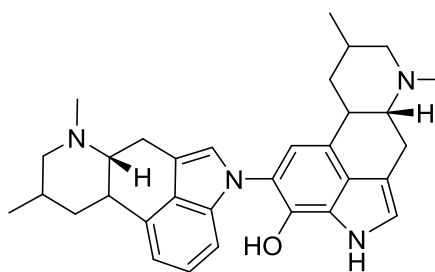

alkaloid

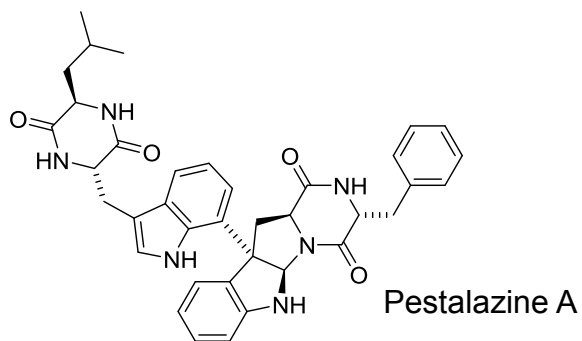

Pestalazine A

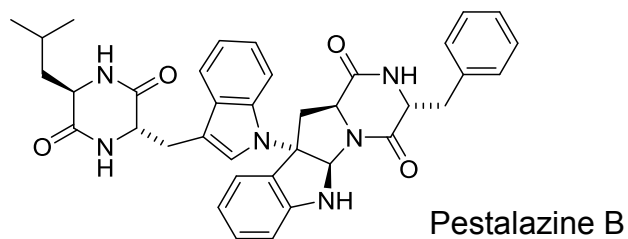

Pestalazine B

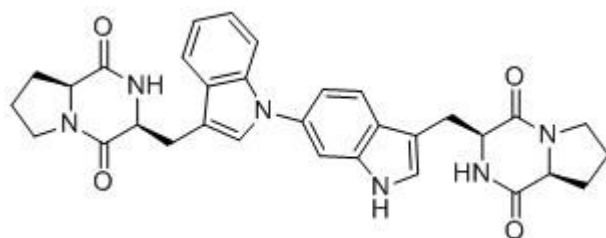

Aspergilazine A

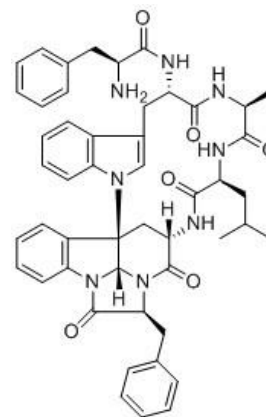

Kapakahine B

**Figure S2.** Incorporation of  $^{15}\text{N}$ -labeled amino acids in tryptorubin A

$^{15}\text{N}_2$  tryptophan

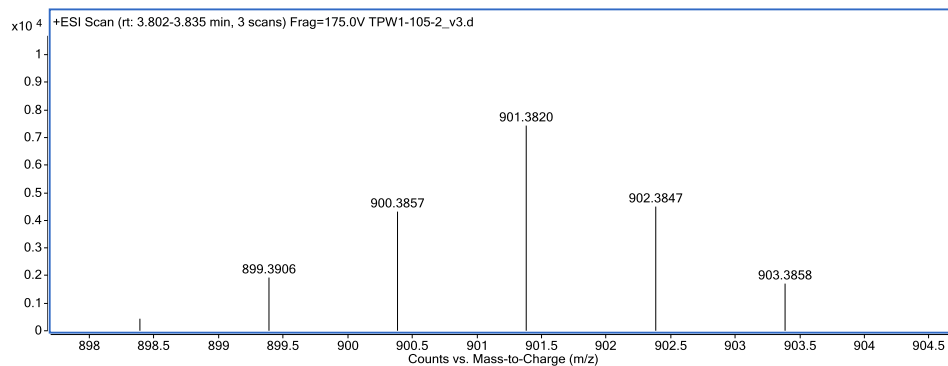

$^{15}\text{N}$  tyrosine

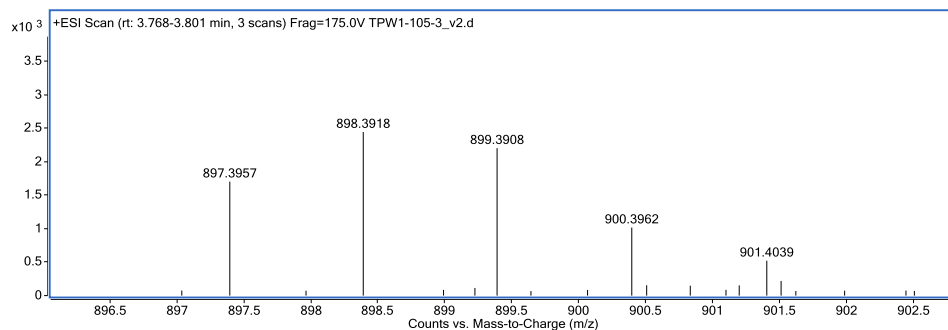

$^{15}\text{N}$  alanine

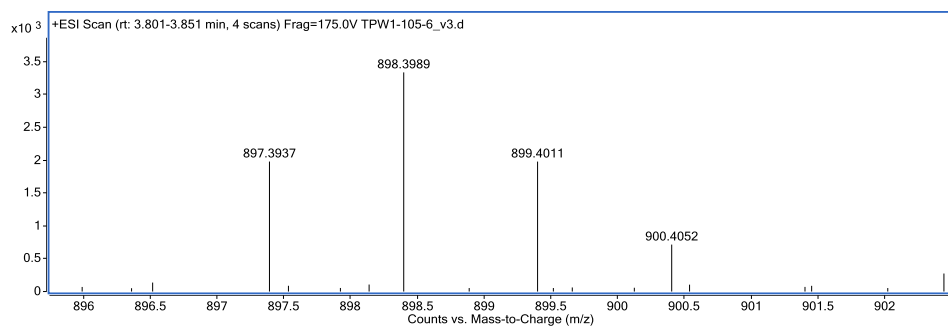

$^{15}\text{N}$  isoleucine

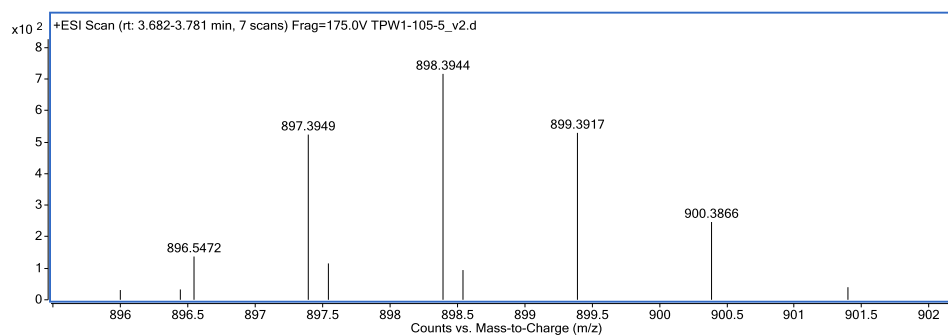

**Figure S3.** Incorporation of L-tryptophan-(indole-d<sub>5</sub>) in tryptorubin A

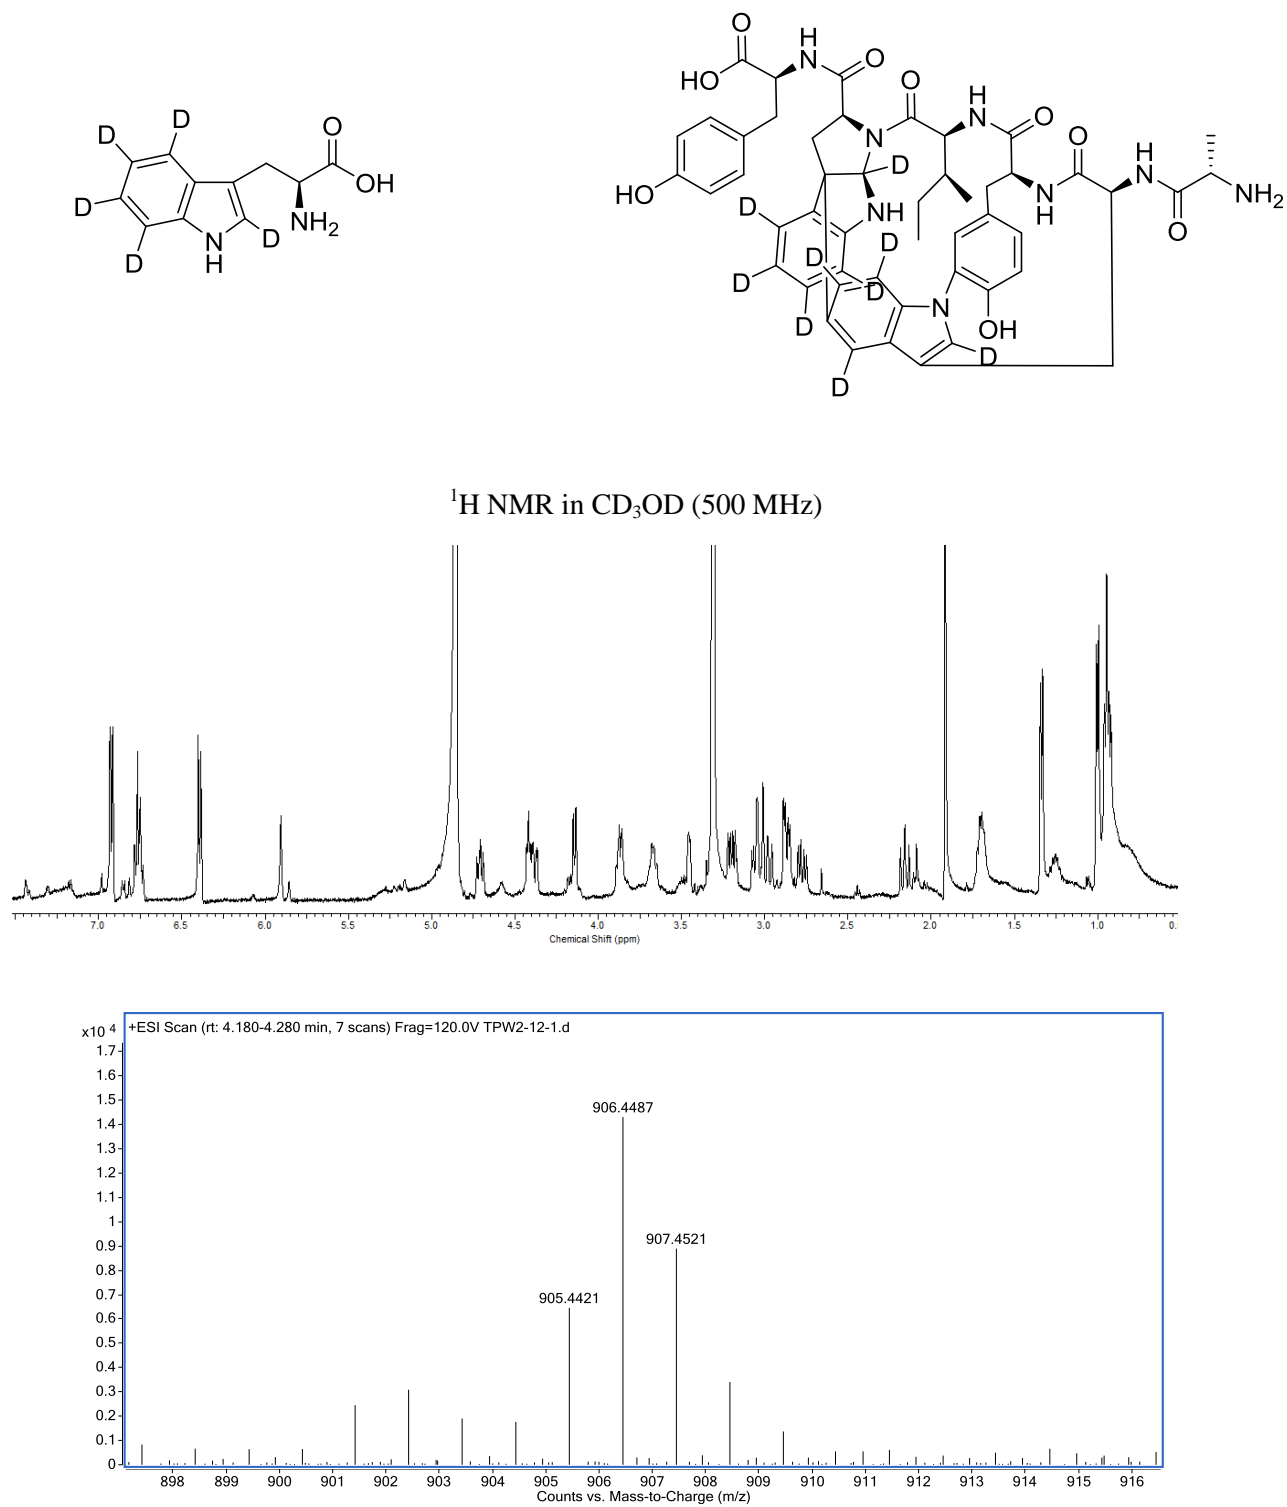

**Figure S4.** Incorporation of L-tyrosine-(ring-3,5-d<sub>2</sub>) in tryptorubin A

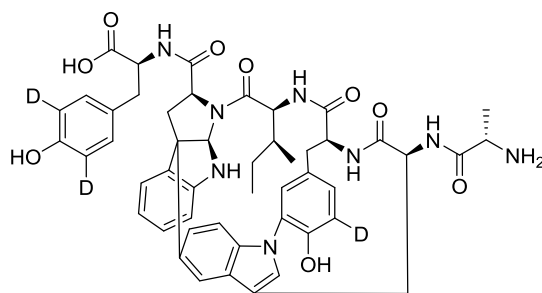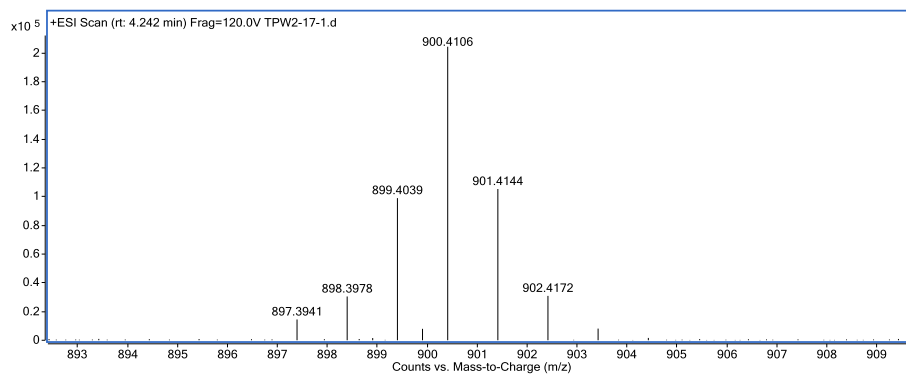

<sup>1</sup>H and gHSQC NMR (CD<sub>3</sub>OD) of tryptorubin A (deuterium-labeled)

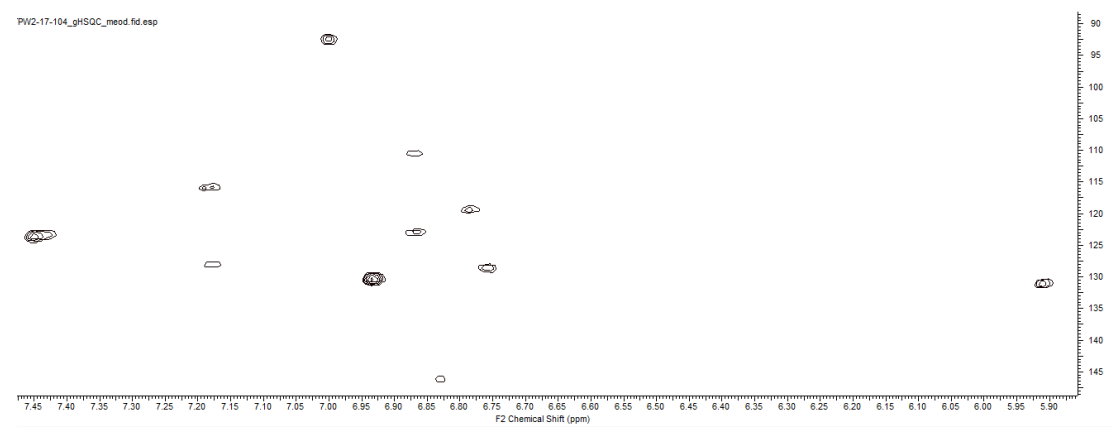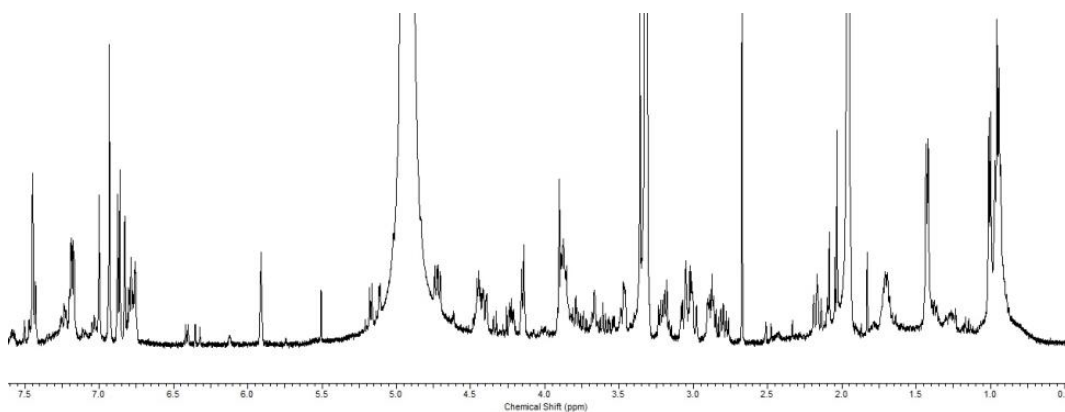

**Figure S5.** Synthetic modifications of tryptorubin A

Acetylated tryptorubin A

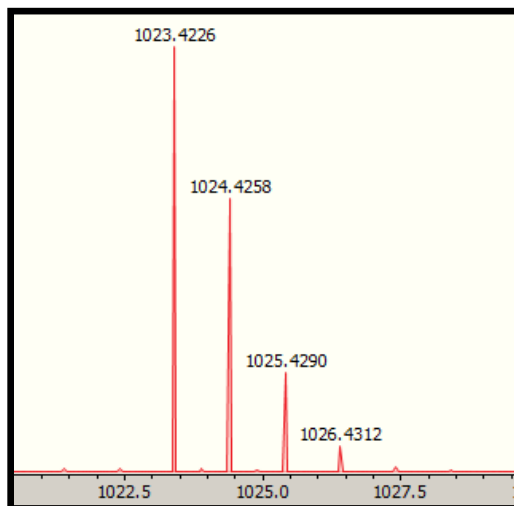

Methylated tryptorubin A

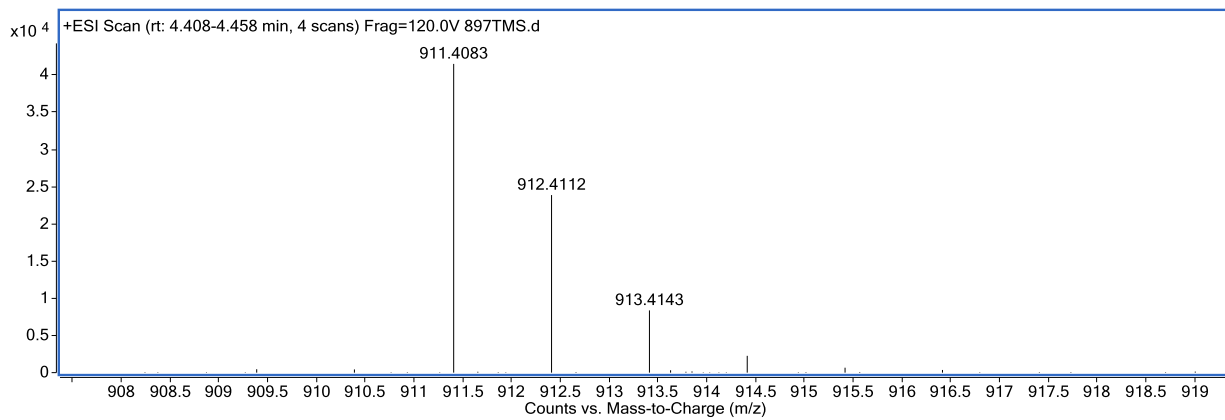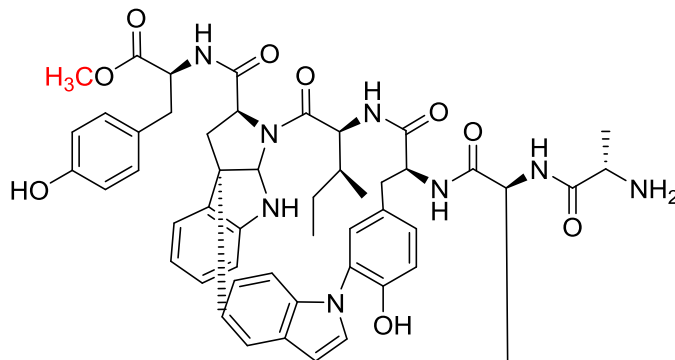

Major product

**Methylated tryptorubin A**  
**<sup>1</sup>H NMR (600 MHz, CD<sub>3</sub>OD)**

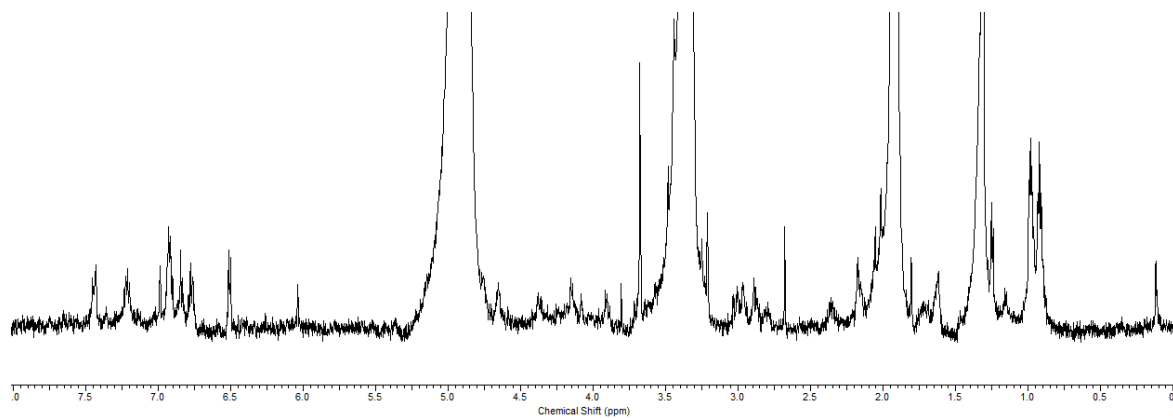

**Methylated tryptorubin A**  
**gCOSY NMR (600 MHz, CD<sub>3</sub>OD)**

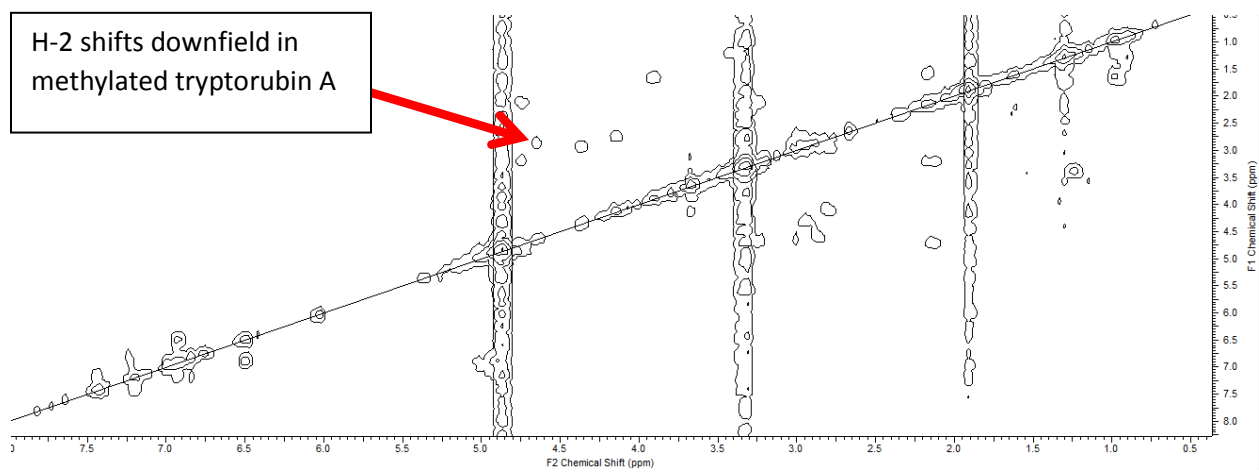

**Tryptorubin A (not methylated)**  
**gCOSY NMR (600 MHz, CD<sub>3</sub>OD)**

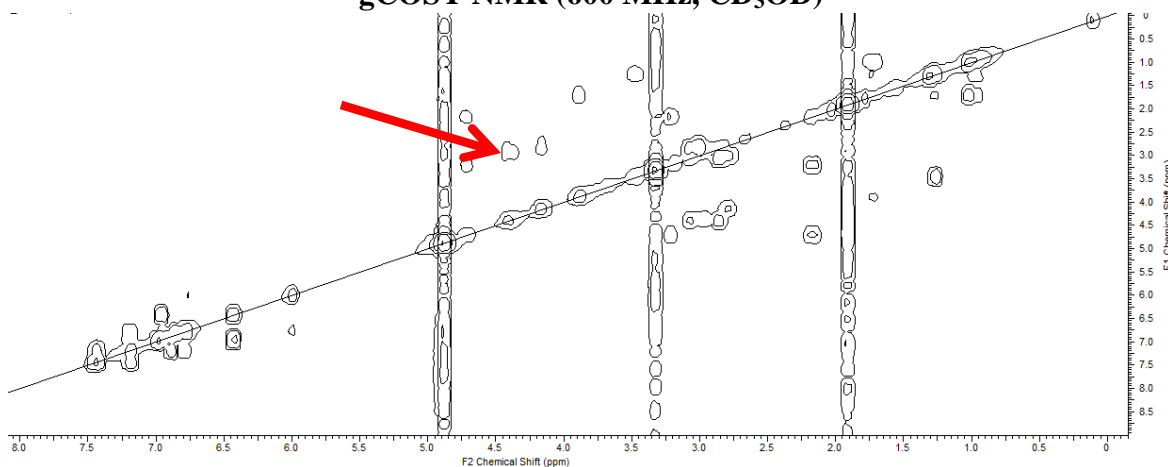

**Figure S6. Marfey's Method – amino acid analysis**

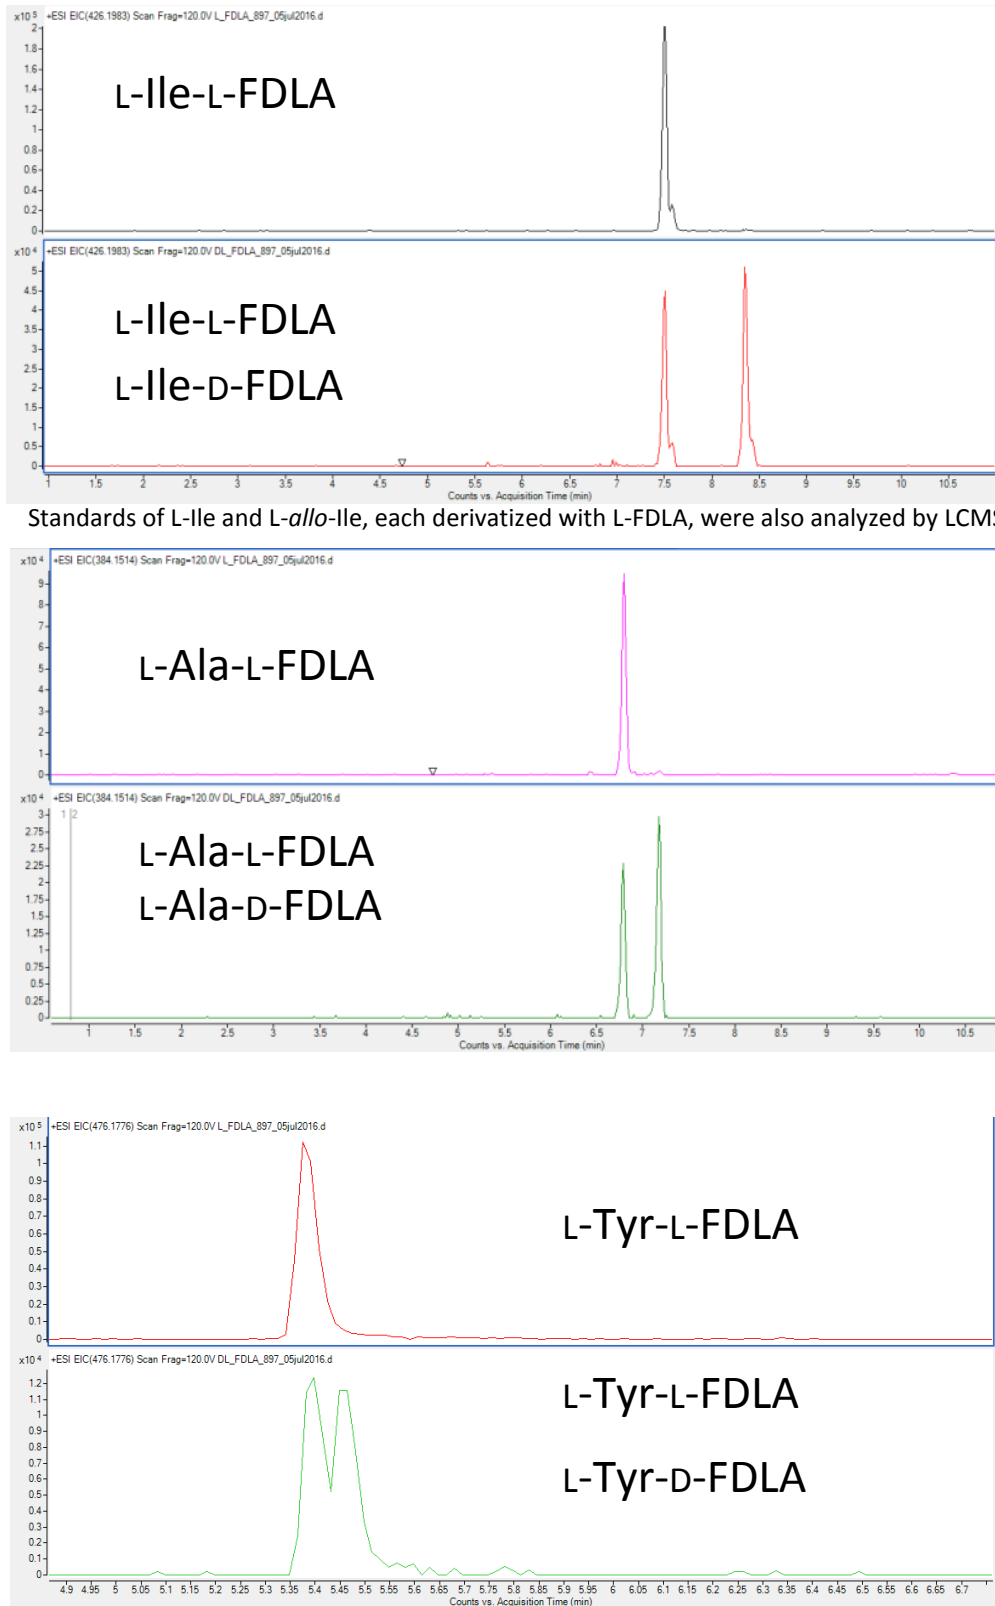

## Figure S7. Molecular modeling analysis

Low energy conformers were obtained using Schrödinger (MMFF, 10000 conformers examined). The low energy conformer for each compound was analyzed using Gaussian 09 for geometry optimization (B3LYP/6-31G(d,p)). Below are the four stereoisomers that were modeled. Only structure 1A fit the ROESY NMR data ( $^1\text{H}$ - $^1\text{H}$  distance  $< 5 \text{ \AA}$ ).

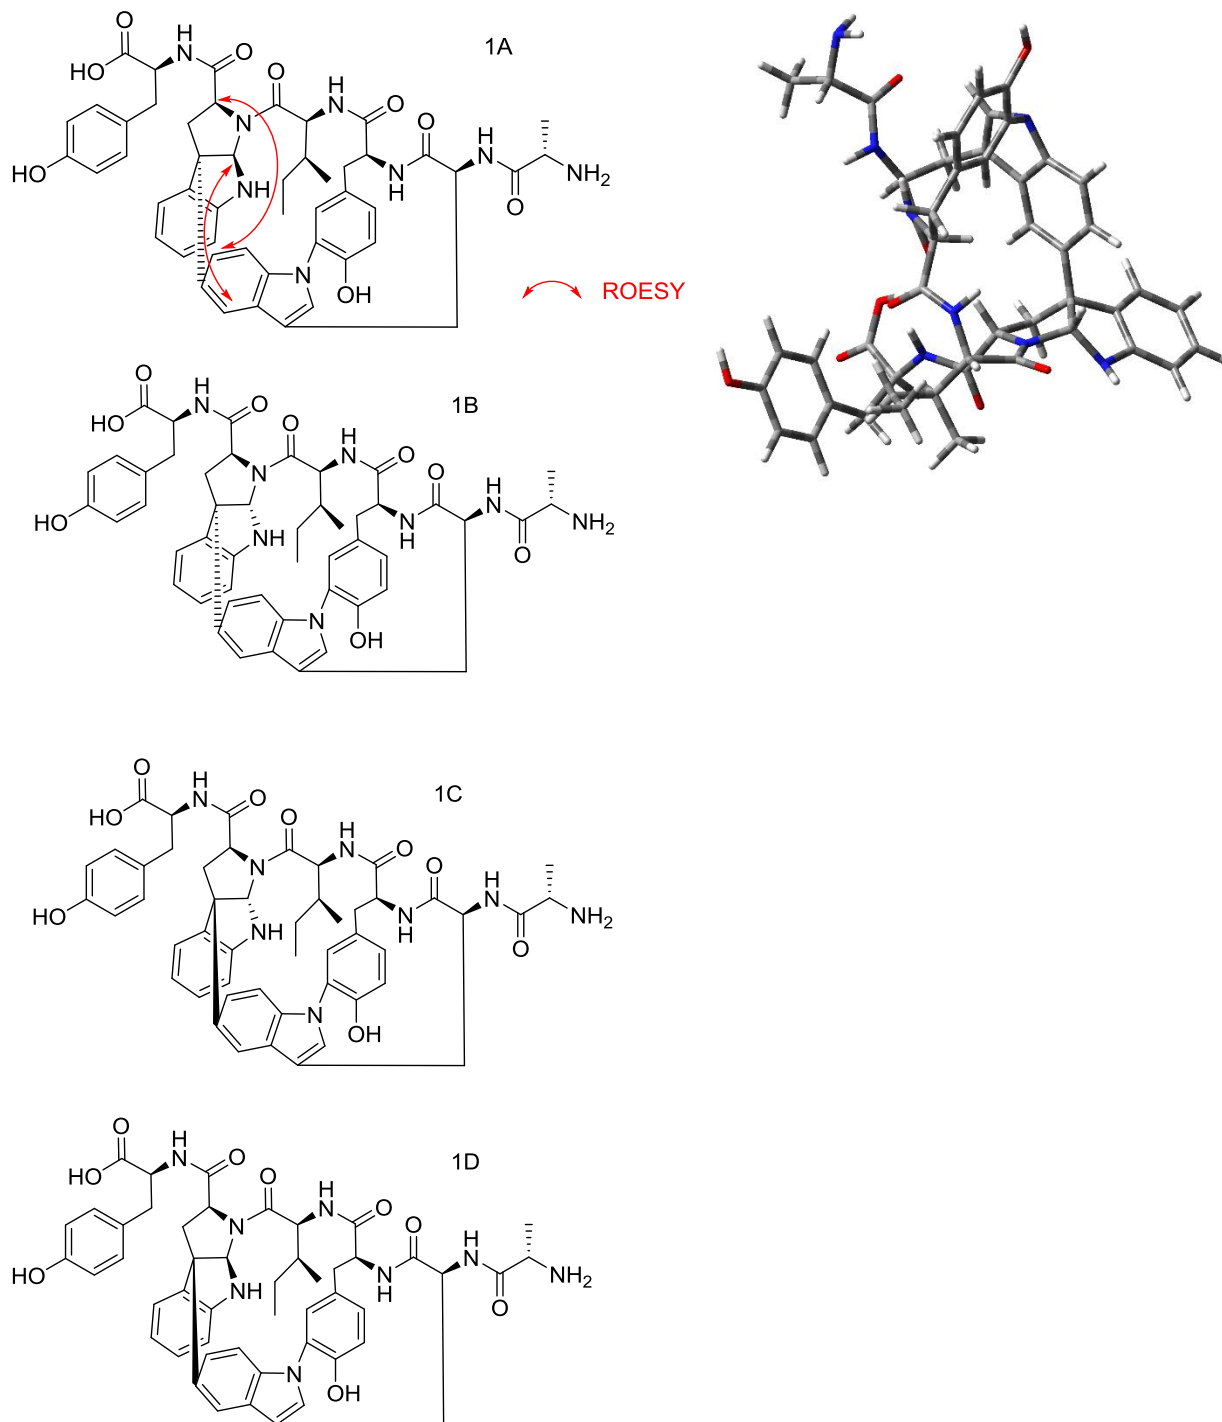



**Table S3.** Summary of *Streptomyces* sp. CLI2509 replicons

|            | Genbank<br>accession no. | length  | G/C<br>content | coverage | mean QV<br>(expected errors) | antiSMASH<br>predicted BGCs |
|------------|--------------------------|---------|----------------|----------|------------------------------|-----------------------------|
| chromosome | CP021118                 | 7.09 Mb | 73.3%          | 253x     | 48.5 (4885)                  | 18                          |
| plasmid    | CP021118                 | 147 kb  | 71.2 %         | 335x     | 48.0 (190)                   | 0                           |

**Table S4.** Gene annotations near NRPSs assigned to linear hexapeptide biosynthesis

| locus<br>tag | NCBI PGAP Annotation                         | RAST annotation <sup>17</sup>                          |
|--------------|----------------------------------------------|--------------------------------------------------------|
| 04995        | hypothetical protein                         | hypothetical protein SC6C5.04c                         |
| 05000        | GntR family transcriptional regulator        | GntR-family transcriptional regulator                  |
| 05005        | iron-sulfur protein                          | putative iron-sulfur protein                           |
| 05010        | hypothetical protein                         | putative transmembrane protein                         |
| 05015        | hypothetical protein                         | Cys-tRNA(Pro) deacylase YbaK                           |
| 05020        | pyruvate oxidase                             | Pyruvate oxidase [ubiquinone, cytochrome] (EC 1.2.2.2) |
| 05025        | hypothetical protein                         | FIG01124407: hypothetical protein                      |
| 05030        | hypothetical protein                         | Cys-tRNA(Pro) deacylase YbaK                           |
| 05035        | hypothetical protein                         | hypothetical protein                                   |
| 05040        | hypothetical protein                         | small hydrophobic protein (putative membrane protein)  |
| 05045        | flavodoxin                                   | Multimeric flavodoxin WrbA                             |
| 05050        | ribosome small subunit-dependent<br>GTPase A | Probable GTPase related to EngC                        |
| 05055        | MFS transporter                              | major facilitator superfamily MFS 1                    |
| 05060        | enoyl-CoA hydratase                          | Enoyl-CoA hydratase (EC 4.2.1.17)                      |
| 05065        | hypothetical                                 | nonribosomal peptide synthetase                        |
| 05070        | methyltransferase type 11                    | Glutamate synthase [NADPH] large chain (EC 1.4.1.13)   |
| 05075        | hypothetical                                 | regulatory protein                                     |
| 05080        | enoyl-CoA hydratase                          | enoyl-CoA hydratase (EC 4.2.1.17)                      |
| 05085        | enoyl-CoA hydratase                          | enoyl-CoA hydratase/isomerase                          |
| 05090        | type III synthase                            | chalcone and stilbene synthases-like                   |
| 05095        | peptide synthase                             | CDA peptide synthetase III                             |
| 05100        | hypothetical                                 | nonribosomal peptide synthetase                        |
| 05105        | GntR family transcriptional regulator        | putative aminotransferase                              |
| 05110        | MbtH family protein                          | putative MbtH family protein                           |
| 05115        | hypothetical protein                         | putative secreted protein                              |
| 05120        | hydrophobic protein                          | hydrophobic protein                                    |
| 05125        | allophanate hydrolase (subunit 2)            | allophanate hydrolase 2 subunit 2 (EC 3.5.1.54)        |
| 05130        | allophanate hydrolase (subunit 1)            | allophanate hydrolase 2 subunit 1 (EC 3.5.1.54)        |
| 05135        | hypothetical protein                         | lactam utilization protein LamB                        |
| 05140        | FAD-binding protein                          | xylitol oxidase (EC:1.1.3.41 )                         |
| 05145        | hypothetical protein                         | FIG00761799: membrane protein                          |
| 05150        | DNA alkylation response protein              | acyl-CoA dehydrogenase (EC 1.3.8.7)                    |
| 05155        | diguanylate cyclase                          | transcriptional regulator                              |
| 05160        | N-acetyltransferase                          | hypothetical protein                                   |

\*The antiSMASH-predicted gene cluster spans nucleotide 1 204 680 to 1 272 231 on the chromosome, however, the last ~8.7 kb encodes for 11 genes involved in sulfate and adenylylsulfate metabolism and have been omitted from this annotation table.

$^1\text{H}$  (600 MHz) and  $^{13}\text{C}$  NMR (125 MHz) for **1** ( $\text{CD}_3\text{OD}$ ) and HRMS data

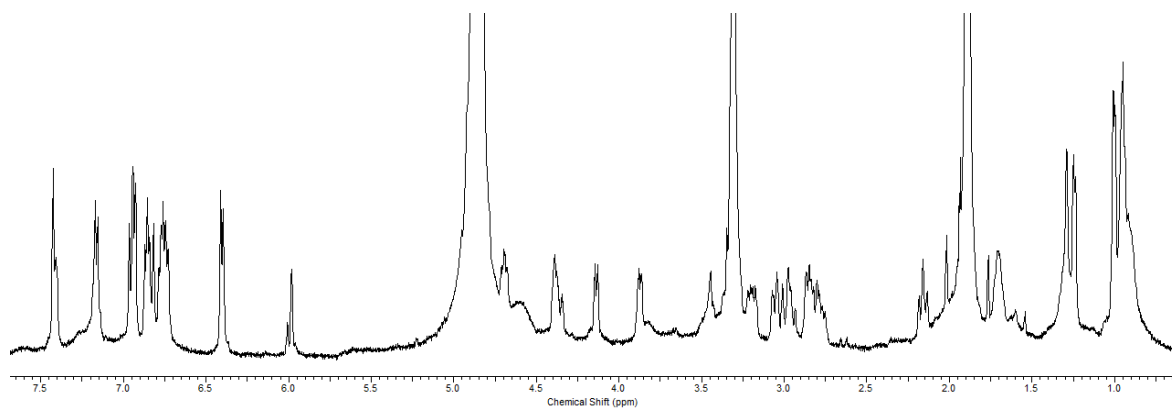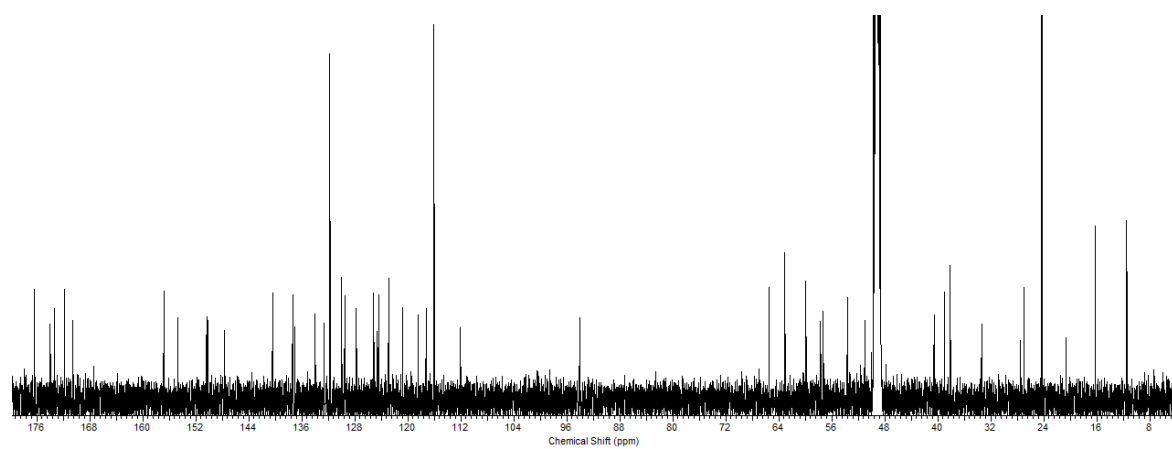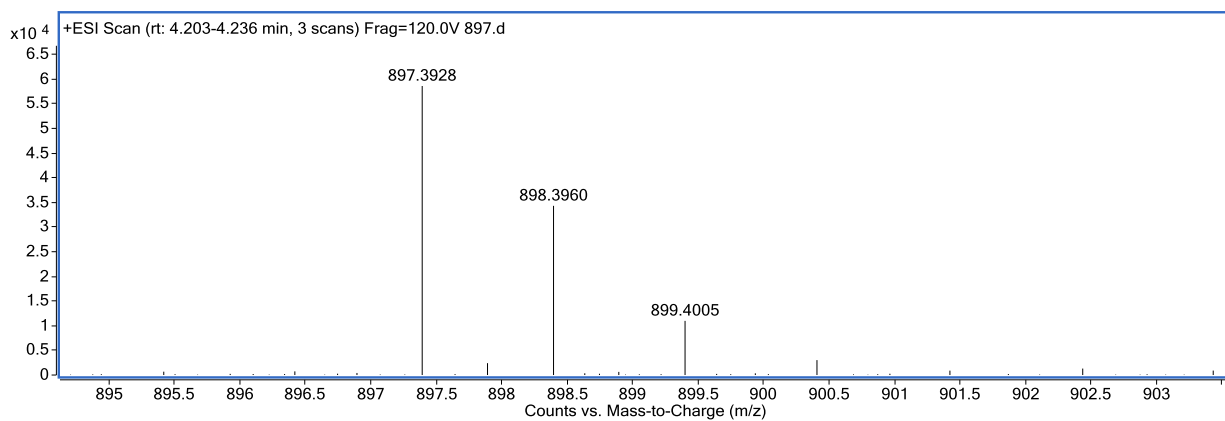

# Additional NMR Data of tryptorubin A (1)

## gCOSY of 1 (CD<sub>3</sub>OD, 600 MHz)

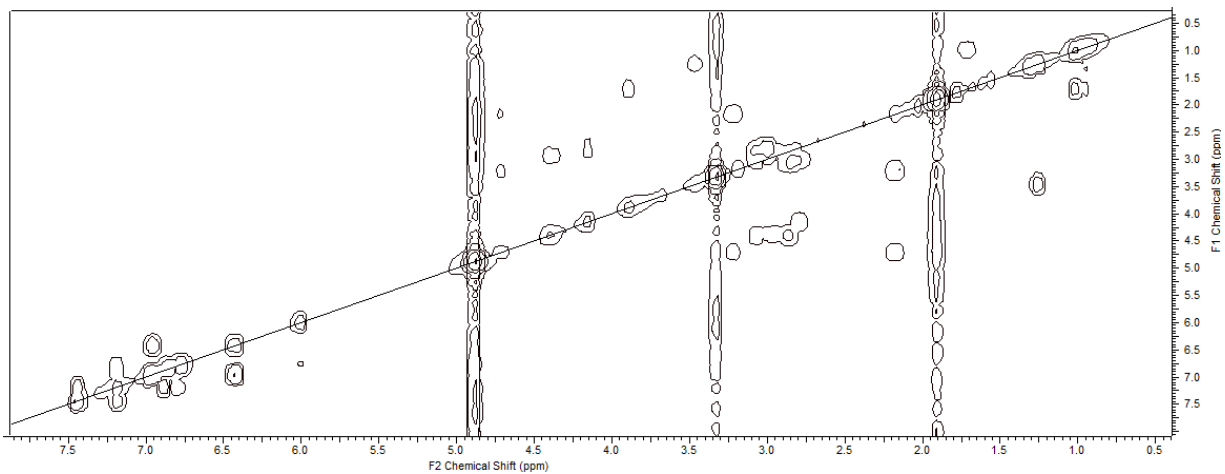

## gHSQC of 1 (CD<sub>3</sub>OD, 600 MHz)

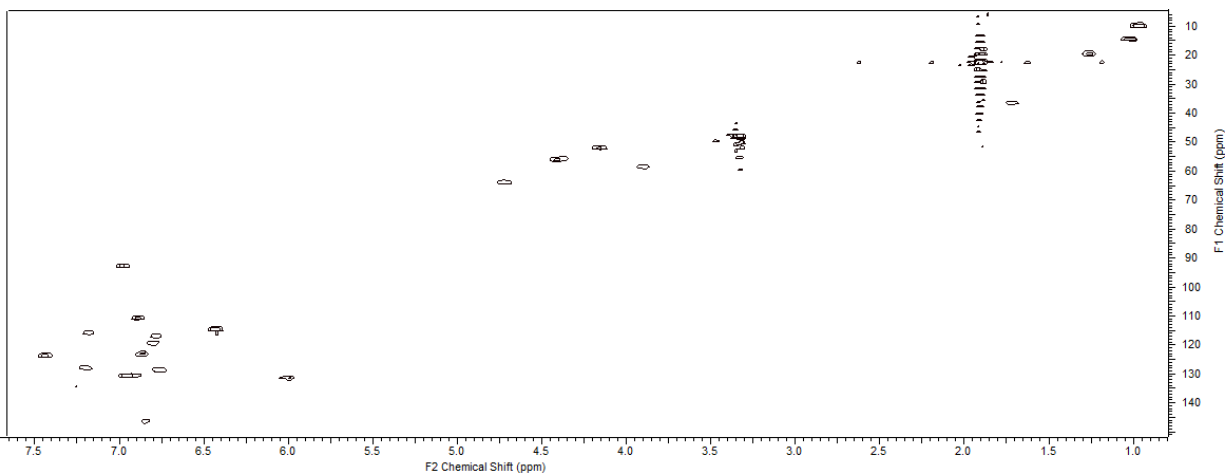

## HMBC of 1 (CD<sub>3</sub>OD, 600 MHz)

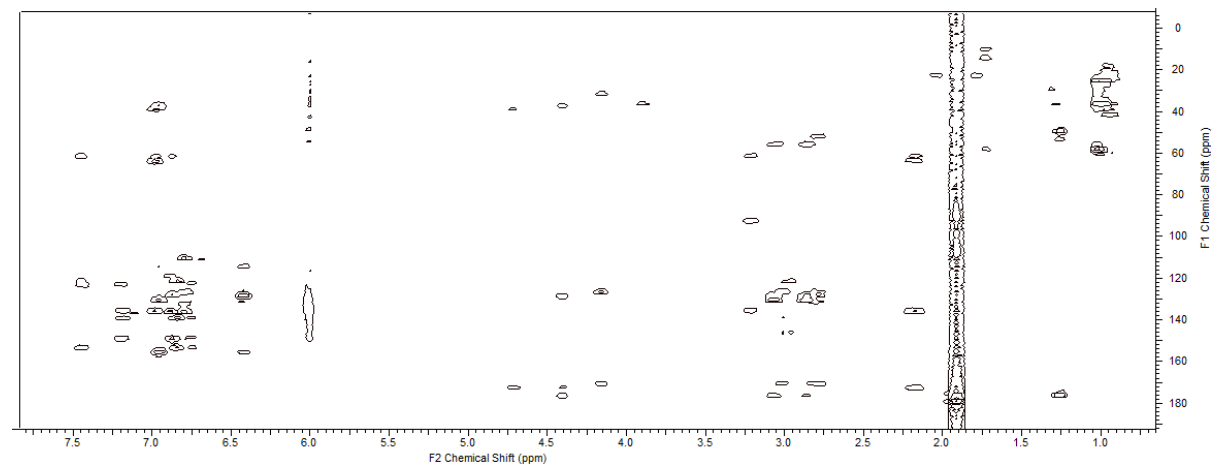

NMR data of  $^{13}\text{C}$ -labeled tryptorubin A (**1**)

$^{13}\text{C}$ - $^{13}\text{C}$  COSY NMR ( $\text{CD}_3\text{OD}$ , 125 MHz)

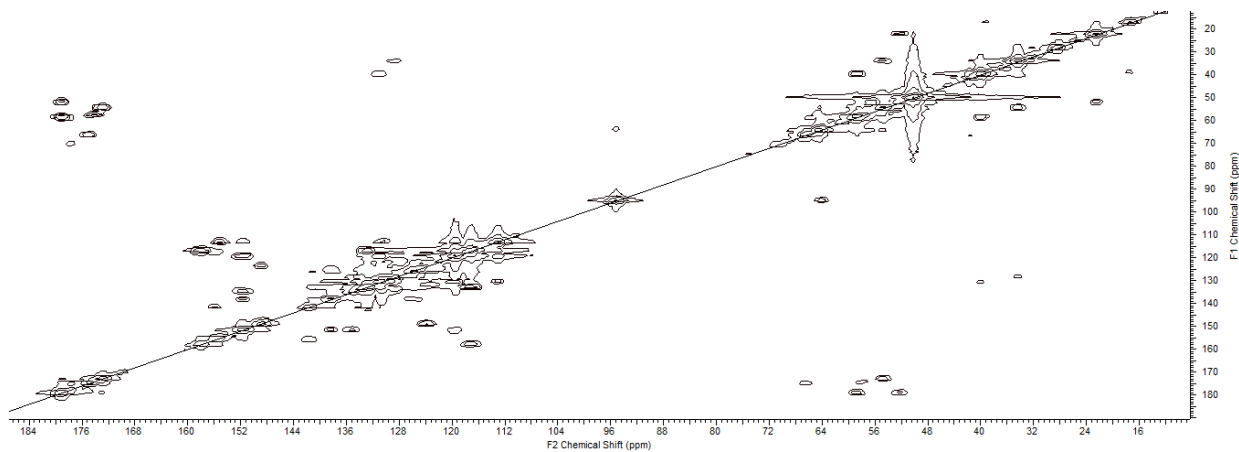

$^{13}\text{C}$  NMR of  $^{13}\text{C}$ -labeled **1** ( $\text{CD}_3\text{OD}$ , 125 MHz)

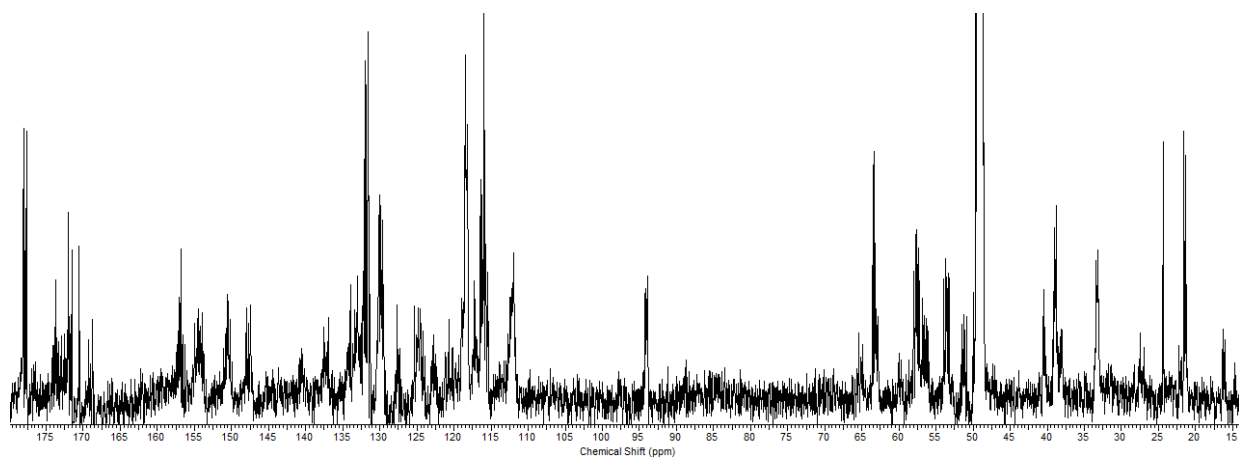

# Additional NMR data of tryptorubin A (1)

$^1\text{H}$  NMR of 1 (DMSO- $d_6$ , 600 MHz)

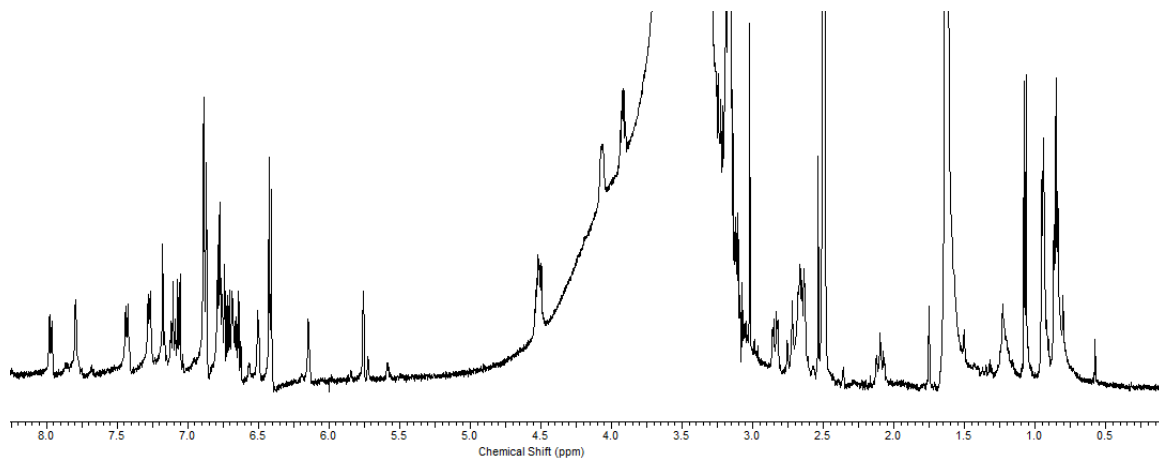

$^{13}\text{C}$  NMR of 1 (DMSO- $d_6$ , 125 MHz)

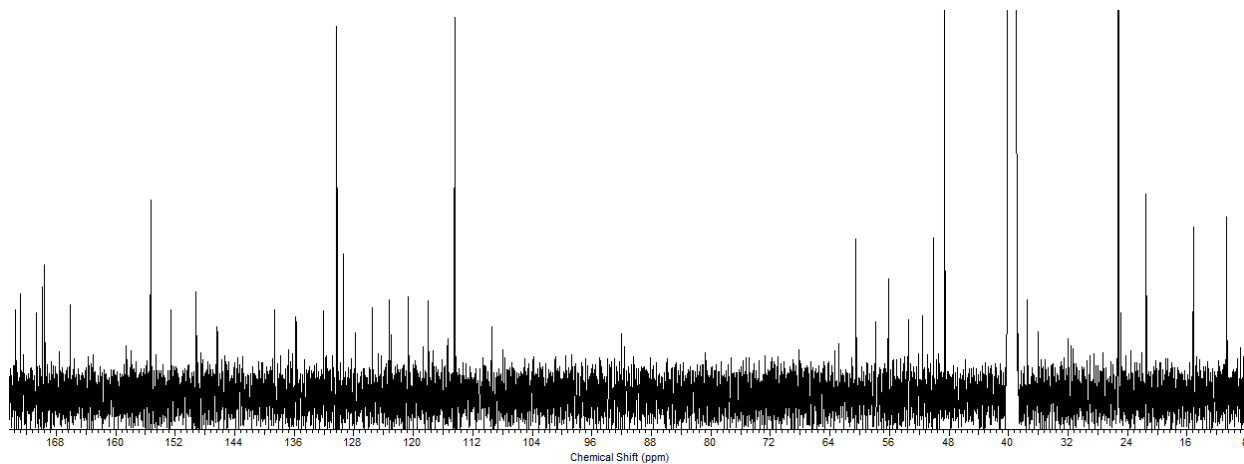

gCOSY of 1 (DMSO- $d_6$ , 600 MHz)

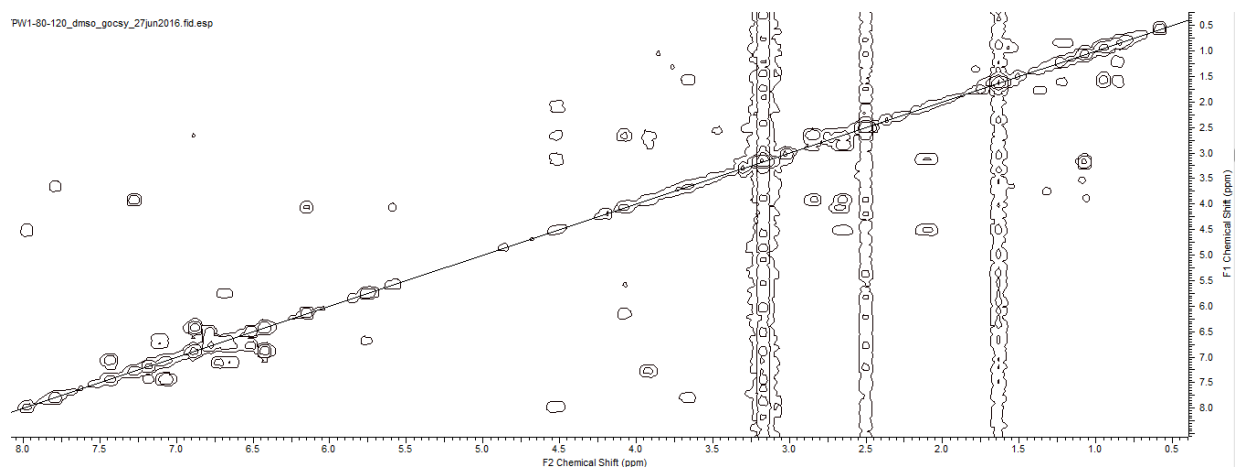

# Additional NMR data of tryptorubin A (1)

## gHSQC of 1 (DMSO-d<sub>6</sub>, 600 MHz)

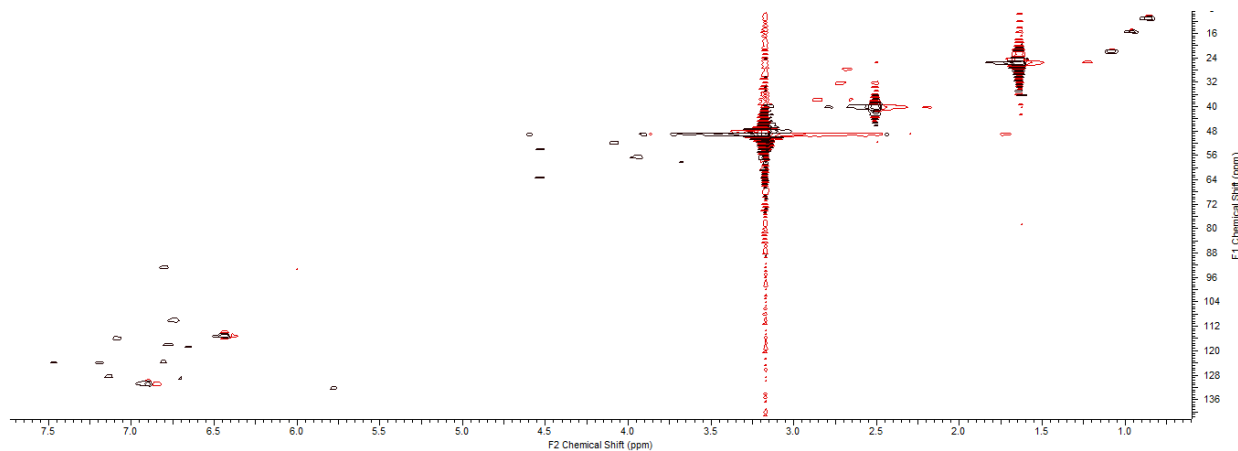

## gHMBC of 1 (DMSO-d<sub>6</sub>, 600 MHz)

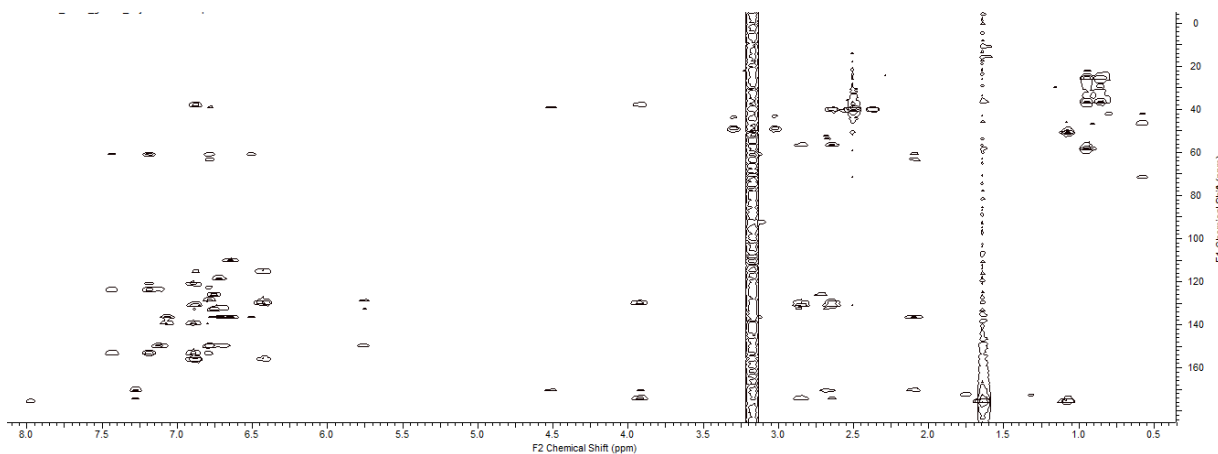

## TOCSY of 1 (DMSO-d<sub>6</sub>, 600 MHz)

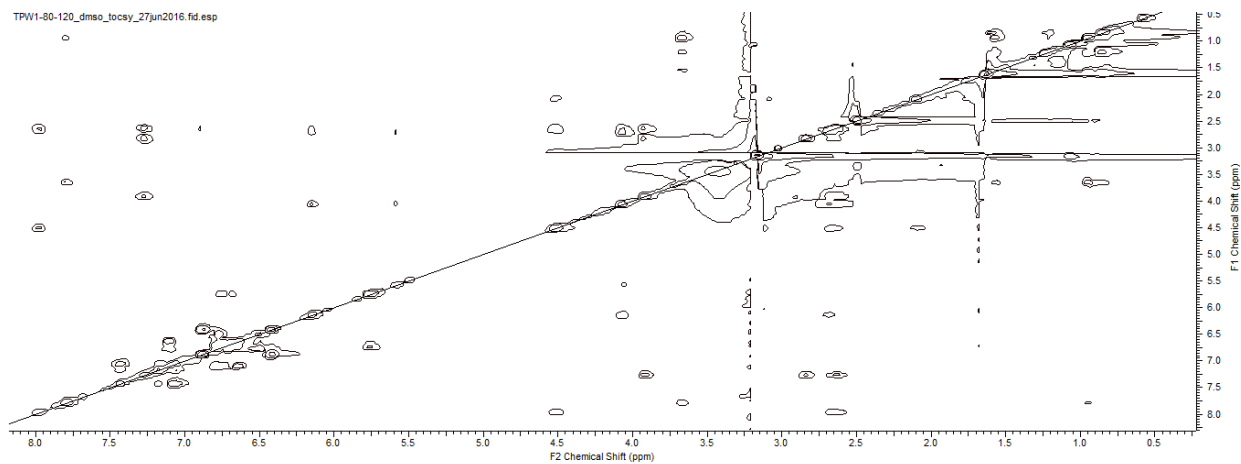

Additional NMR Data of tryptorubin A (**1**)

ROESY of **1** (DMSO-d<sub>6</sub>, 600 MHz)

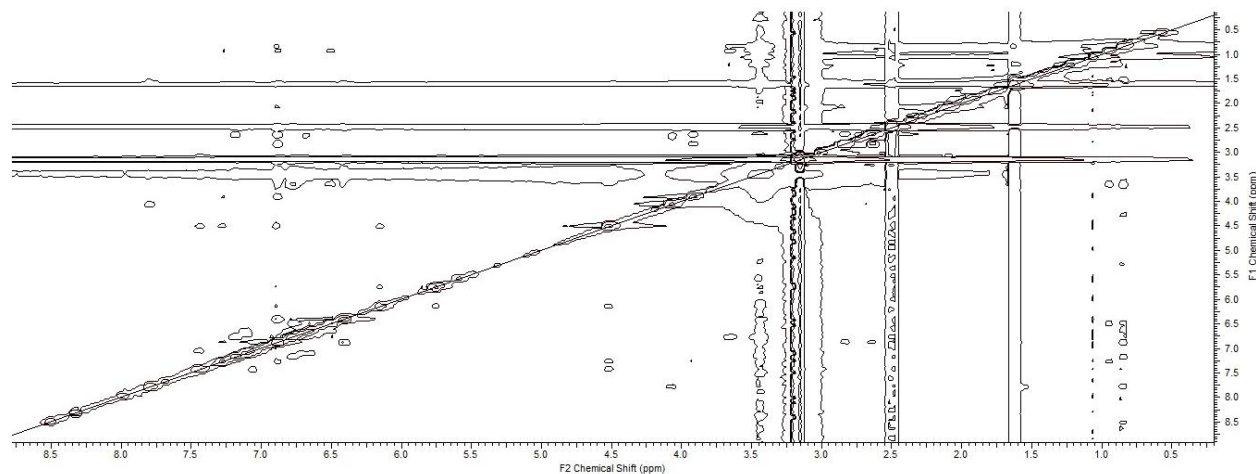

<sup>15</sup>N HSQC of **1** (DMSO-d<sub>6</sub>, 600 MHz)

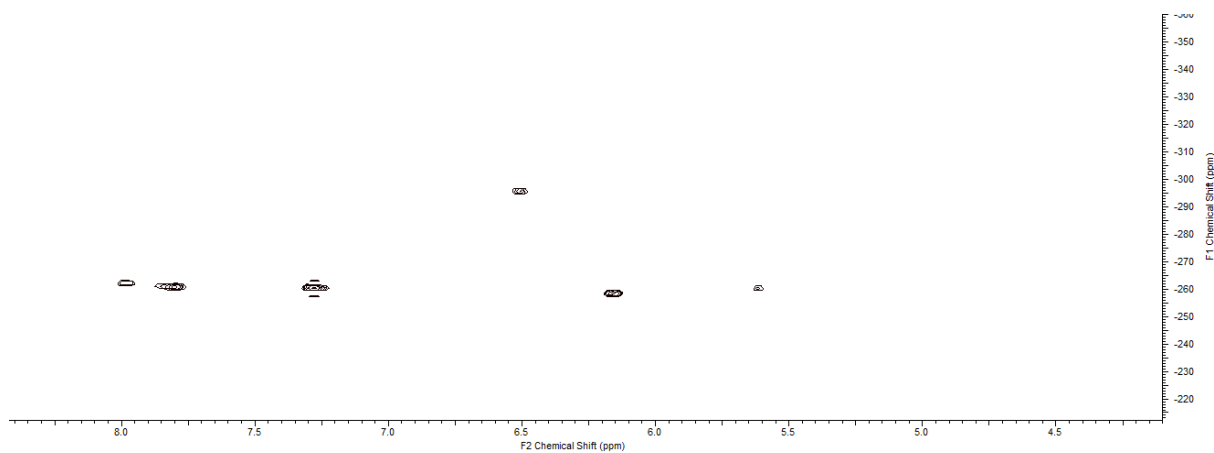

<sup>15</sup>N HMBC of **1** (DMSO-d<sub>6</sub>, 600 MHz)

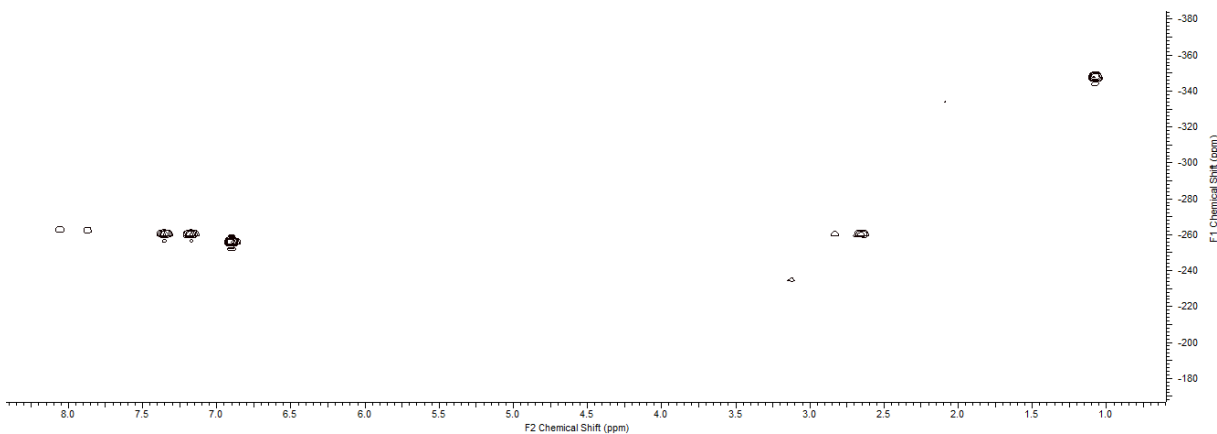

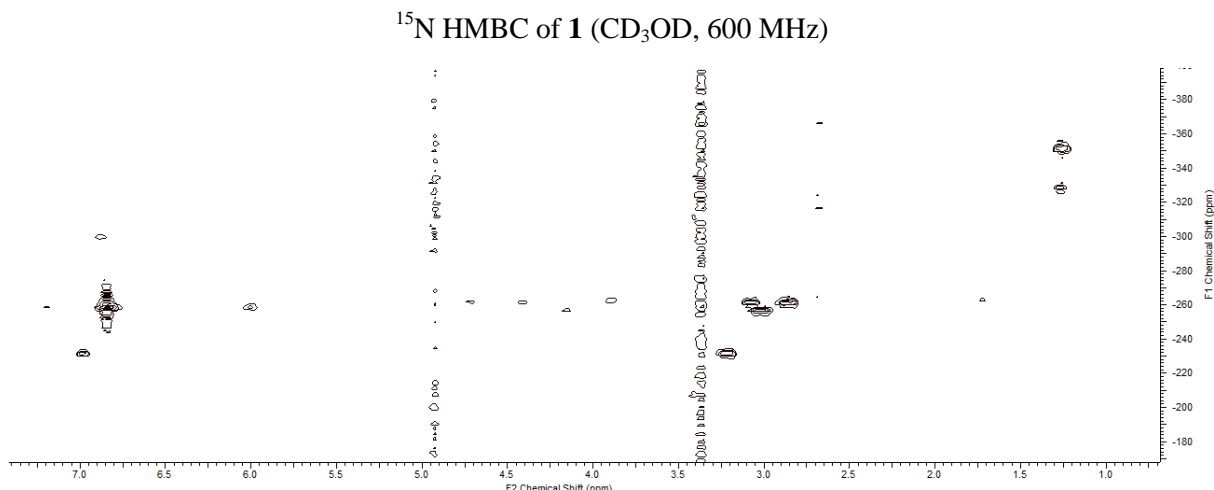

## References

1. Wyche, T. P.; Hou, Y.; Braun, D.; Cohen, H. C.; Xiong, M. P.; Bugni, T. S. *J. Org. Chem.* **2011**, *76*, 6542–6547.
2. Frisch, M. J.; Trucks, G. W.; Schlegel, H. B.; Scuseria, G. E.; Robb, M. A.; Cheeseman, J. R.; Scalmani, G.; Barone, V.; Mennucci, B.; Petersson, G. A.; Nakatsuji, H.; Caricato, M.; Li, X.; Hratchian, H. P.; Izmaylov, A. F.; Bloino, J.; Zheng, G.; Sonnenberg, J. L.; Hada, M.; Ehara, M.; Toyota, K.; Fukuda, R.; Hasegawa, J.; Ishida, M.; Nakajima, T.; Honda, Y.; Kitao, O.; Nakai, H.; Vreven, T.; Montgomery, J. A., Jr.; Peralta, J. E.; Ogliaro, F.; Bearpark, M.; Heyd, J. J.; Brothers, E.; Kudin, K. N.; Staroverov, V. N.; Kobayashi, R.; Normand, J.; Raghavachari, K.; Rendell, A.; Burant, J. C.; Iyengar, S. S.; Tomasi, J.; Cossi, M.; Rega, N.; Millam, N. J.; Klene, M.; Knox, J. E.; Cross, J. B.; Bakken, V.; Adamo, C.; Jaramillo, J.; Gomperts, R.; Stratmann, R. E.; Yazyev, O.; Austin, A. J.; Cammi, R.; Pomelli, C.; Ochterski, J. W.; Martin, R. L.; Morokuma, K.; Zakrzewski, V. G.; Voth, G. A.; Salvador, P.; Dannenberg, J. J.; Dapprich, S.; Daniels, A. D.; Farkas, Ö.; Foresman, J. B.; Ortiz, J. V.; Cioslowski, J.; Fox, D. J. *Gaussian 09*, Revision A.1; Gaussian, Inc.: Wallingford, CT, 2009.



3. Foresman, J. B., and Frisch, A. (1996) *Exploring Chemistry with Electronic Structure Methods*, 2 ed., Gaussian, Inc., Pittsburgh, PA.
4. Marfey, P. *Carlsberg Res. Commun.* **1984**, *49*, 591–596.
5. Fujii, K.; Ikai, Y.; Oka, H.; Suzuki, M.; Harada, K. *Anal. Chem.* **1997**, *69*, 5146-5151.
6. Whitson, E. L.; Ratnayake, A. S.; Bugni, T. S.; Harper, M. K.; Ireland, C. M. *J. Org. Chem.* **2009**, *74*, 1156–1162.
7. Yu, L.; Trujillo, M.E.; Miyanaga, S.; Saiki, I.; Igarashi, Y. *J. Nat. Prod.* **2014**, *77*, 976-982.
8. Weber, T.; Blin, K.; Duddela, S.; Krug, D.; Kim, H.U.; Bruccoleri, R.; Lee, S.Y.; Fischbach, M.A.; Müller, R.; Wohlleben, W.; Breitling, R.; Takano, E.; Medema, M.H. *Nucl. Acids Res.* **2015**, *43*, W237-W243.
9. Ding, G.; Jiang, L.; Guo, L.; Chen, X.; Zhang, H.; Che, Y. *J. Nat. Prod.* **2008**, *71*, 1861-1865.
10. Raju, R.; Piggot, A.M.; Conte, M.; Aalbersberg, K.F.; Capon, R.J. *Org. Lett.* **2009**, *11*, 3862-3865.
11. Kim, J.; Movassaghi, M. *J. Am. Chem. Soc.* **2011**, *133*, 14940-14943.
12. Varoglu, M.; Corbett, T.H.; Valeriote, F.A.; Crews, P. *J. Org. Chem.* **1997**, *62*, 7078-7079.
13. Takase, S.; Iwami, M.; Ando, T.; Okamoto, M.; Yoshida, K.; Horiai, H.; Kohsaka, M.; Aoki, H.; Imanaka, H. *J. Antibiot.* **1984**, *37*, 1320-1323.
14. Nakao, Y.; Yeung, B.K.S.; Yoshida, W.Y.; Scheuer, P.J. Kelly-Borges, M. *J. Am. Chem. Soc.* **1995**, *117*, 8271-8272.

15. Vining, L.C.; McInnes, A.G.; Smith, D.G.; Wright, J.L.C.; Taber, W.A. *FEMS Symp.* **1982**, *13*, 243-251.
16. Cai, S.; Kong, X.; Wang, W.; Zhou, H.; Zhu, T.; Li, D.; Gu, Q. *Tet. Lett.* **2012**, *53*, 2615-2617.
17. Aziz, R.K.; Bartels, D.; Best, A.A.; DeJongh, M.; Disz, T.; Edwards, R.A.; Formsma, K.; Gerdes, S.; Glass, E.M.; Kubal, M.; Meyer, F.; Olsen, G.J.; Olson, R.; Osterman, A.L.; Overbeek, R.A.; McNeil, L.K.; Paarmann, D.; Paczian, T.; Parrello, B.; Pusch, G.D.; Reich, C.; Stevens, R.; Vassieva, O.; Vonstein, V.; Wilke, A.; Zagnitko, O. *BMC Genomics.* **2008**, *9*, 75.
